# Supplementary material for: Porcupine: A visual pipeline tool for neuroimaging analysis
Source: PLOS journal article supplement (doi:10.1371/journal.pcbi.1006064), 2018-05-10
Supplement: S1 (10.1371/journal.pcbi.1006064.s001) [file journal.pcbi.1006064.s001]

## Supporting information

**S1 Docker files** Porcupine provides a Docker image that creates the necessary run time environment for a pipeline that is constructed in the workflow editor. As with all generated code, the Docker code is fully customisable to a researcher's need, but our suggested scaffold requires only a single manual edit to be built as a Docker image. A Docker script can only refer to online or on-disk resources, so the pipeline file needs to be saved manually and added to the Docker file:

```
ADD /path/to/pipeline/script.py /somewhere/porcupipeline.py
CMD ["python", "/somewhere/porcupipeline.py"]
```

Once this line is added, the docker image can be built:

```
$ docker build -t mydockerimage -f Dockerfile
```

The output from the executed pipeline can be written to a local directory on a researcher's computer ('/my/local/directory') by mounting it to the docker output directory ('/data') with the '-v' option and running the image as if it were a standalone application.

```
$ docker run -v /my/local/directory:/data mydockerimage
```

This Docker command will execute the pipeline: load the data from an online repository, process the data, and store only the output data to a local directory. A fully worked out example with detailed explanation can be found [here](#).
